# Supplementary material for: Two Novel Hepatocellular Carcinoma Cycle Inhibitory Cyclodepsipeptides from a Hydrothermal Vent Crab-Associated Fungus Aspergillus clavatus C2WU
Source: MDPI journal article supplement (doi:10.3390/md11124761), 2013-12-02

## Supplementary Information

**Figure S1.**  $^1\text{H}$  NMR in  $\text{CDCl}_3$  for compound **1**.

**Figure S2.**  $^1\text{H}$  NMR-2 in  $\text{CDCl}_3$  for compound **1**.

**Figure S3.**  $^{13}\text{C}$  NMR in  $\text{CDCl}_3$  for compound **1**.

**Figure S4.** DEPT in  $\text{CDCl}_3$  for compound **1**.

**Figure S5.** COSY in  $\text{CDCl}_3$  for compound **1**.

**Figure S6.** COSY-2 in  $\text{CDCl}_3$  for compound **1**.

**Figure S7.** HSQC in  $\text{CDCl}_3$  for compound **1**.

**Figure S8.** HMBC in  $\text{CDCl}_3$  for compound **1**.

**Figure S9.** HMBC-2 in  $\text{CDCl}_3$  for compound **1**.

**Figure S10.**  $^1\text{H}$  NMR in  $\text{CDCl}_3$  for compound **2**.

**Figure S11.**  $^1\text{H}$  NMR-2 in  $\text{CDCl}_3$  for compound **2**.

**Figure S12.**  $^{13}\text{C}$  NMR in  $\text{CDCl}_3$  for compound **2**.

**Figure S13.** COSY in  $\text{CDCl}_3$  for compound **2**.

**Figure S14.** COSY-2 in  $\text{CDCl}_3$  for compound **2**.

**Figure S15.** DEPT in  $\text{CDCl}_3$  for compound **2**.

**Figure S16.** HSQC in  $\text{CDCl}_3$  for compound **2**.

**Figure S17.** HMBC in  $\text{CDCl}_3$  for compound **2**.

**Figure S18.** HMBC-2 in  $\text{CDCl}_3$  for compound **2**.

**Figure S19.** IR for compound **1**.

**Figure S20.** IR for compound **2**.

**Figure S21.** HR-TOF-MS for compound **1**.

**Figure S22.** HR-TOF-MS for compound **2**.

**Figure S23.** CD for compound **1**.

**Figure S24.** CD for compound **2**.

**Figure S25.** CID for compound **1**.

Figure S1.  $^1\text{H}$  NMR in  $\text{CDCl}_3$  for compound 1.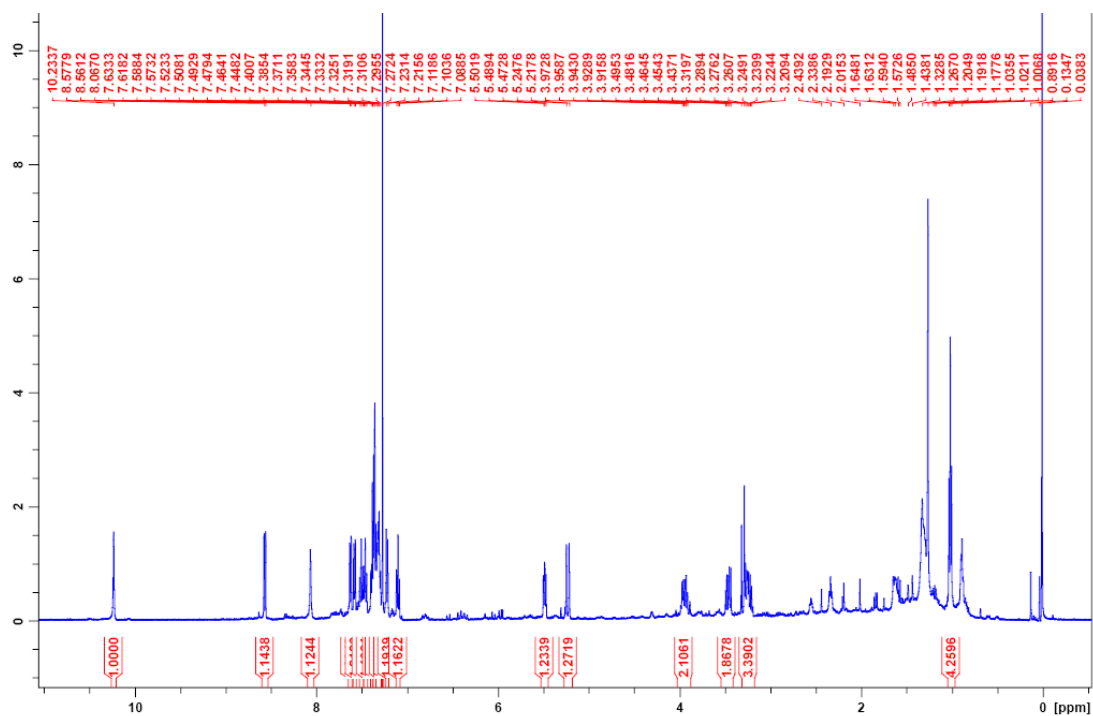Figure S2.  $^1\text{H}$  NMR-2 in  $\text{CDCl}_3$  for compound 1.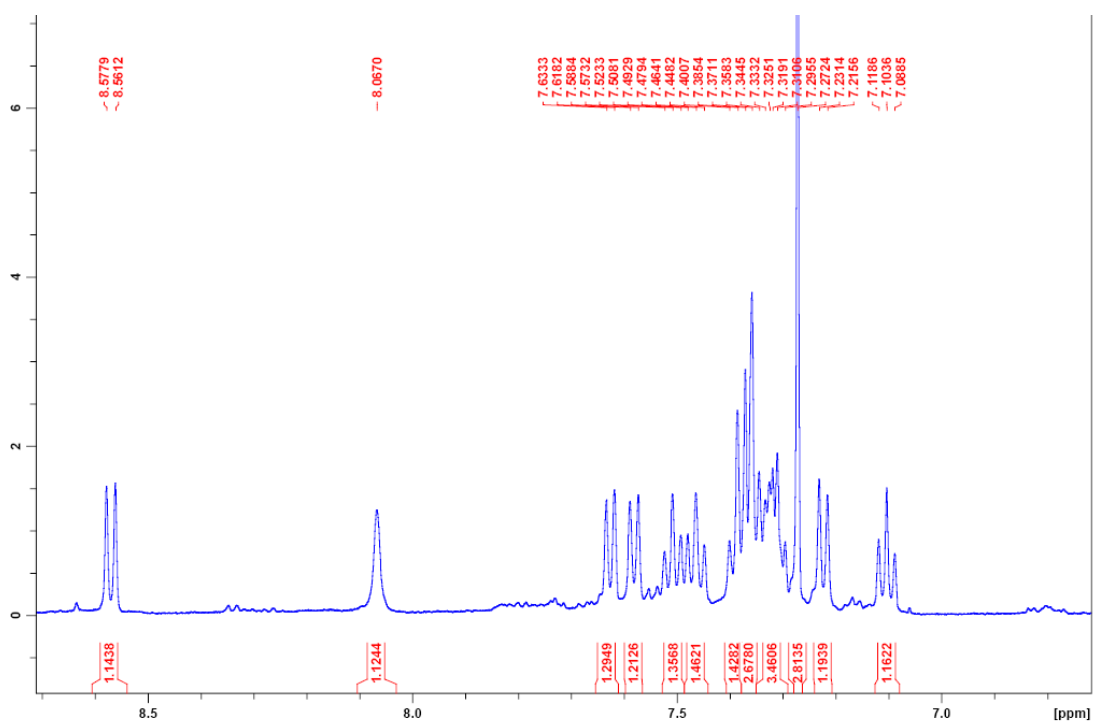

Figure S3.  $^{13}\text{C}$  NMR in  $\text{CDCl}_3$  for compound 1.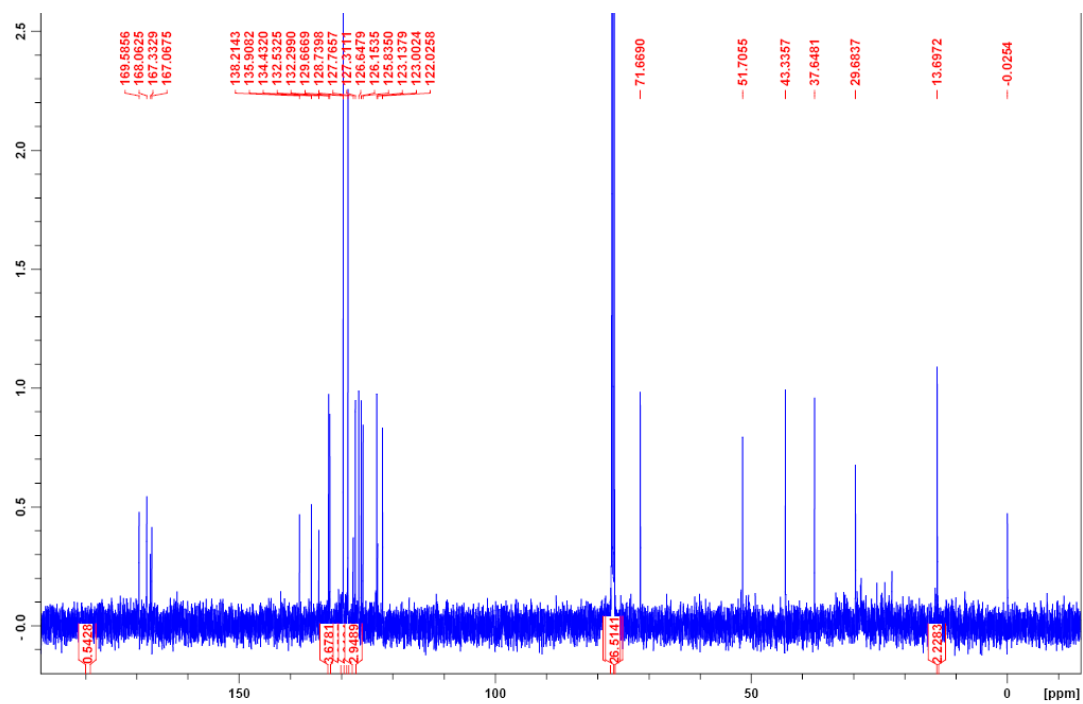Figure S4. DEPT in  $\text{CDCl}_3$  for compound 1.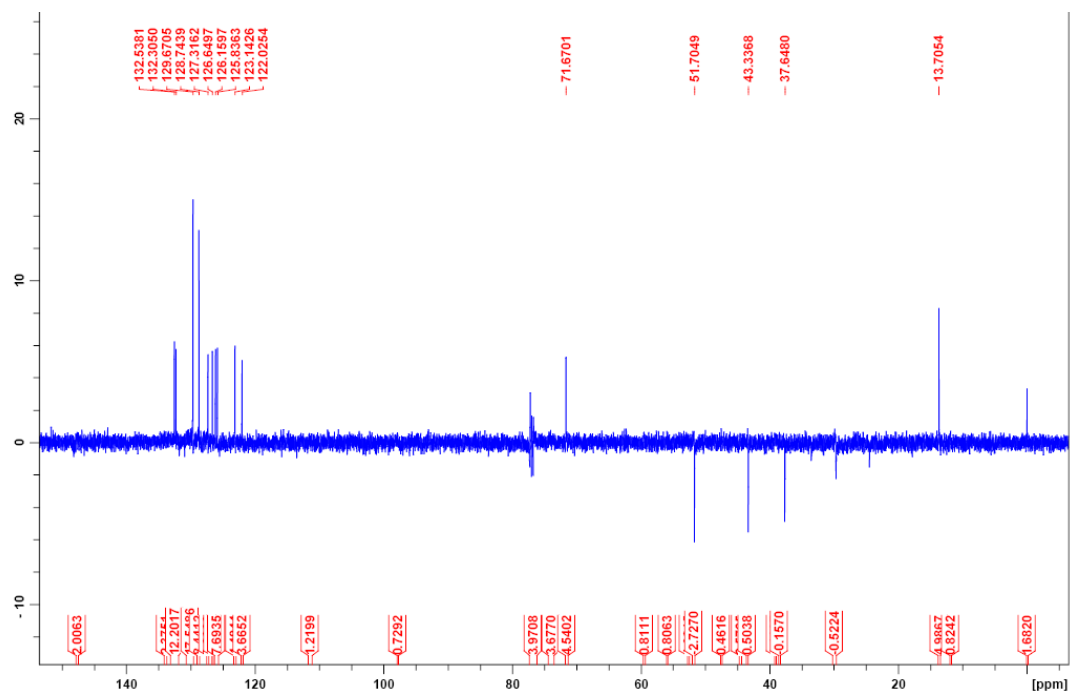

Figure S5. COSY in CDCl<sub>3</sub> for compound 1.

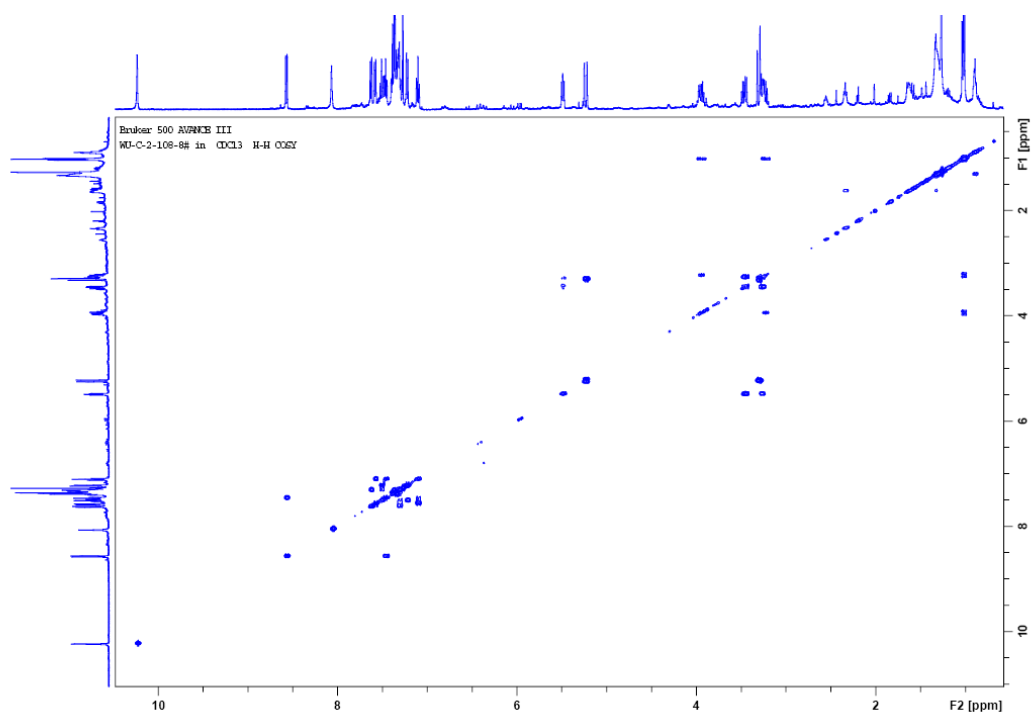

Figure S6. COSY-2 in CDCl<sub>3</sub> for compound 1.

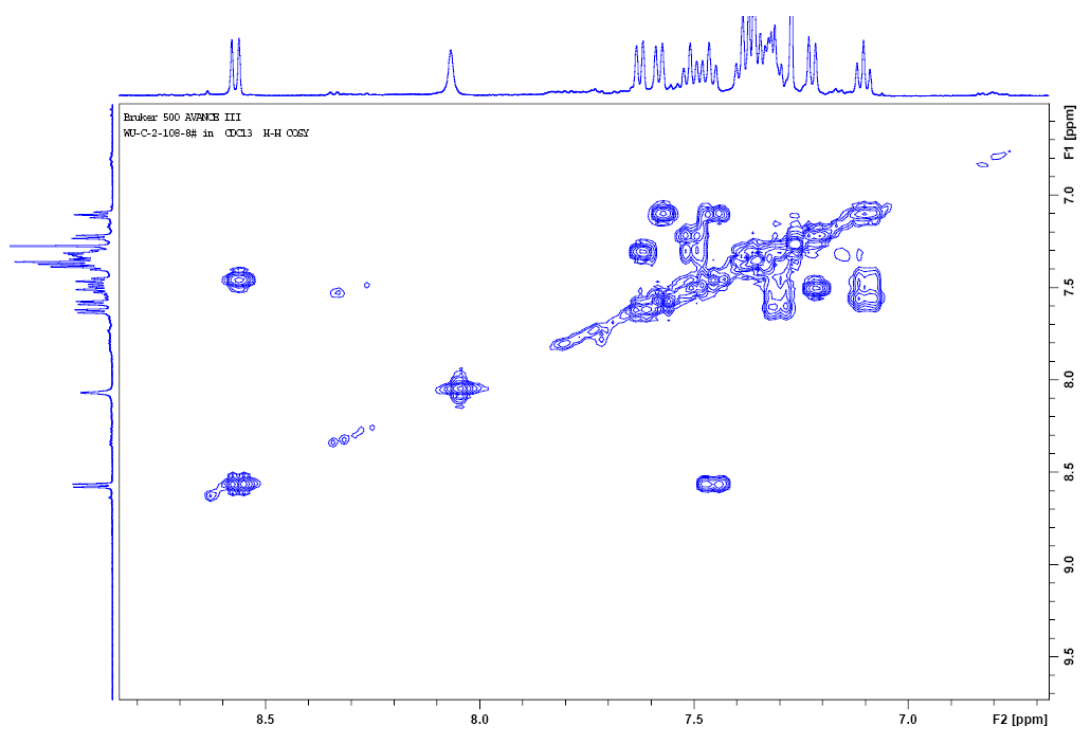

Figure S7. HSQC in CDCl<sub>3</sub> for compound 1.

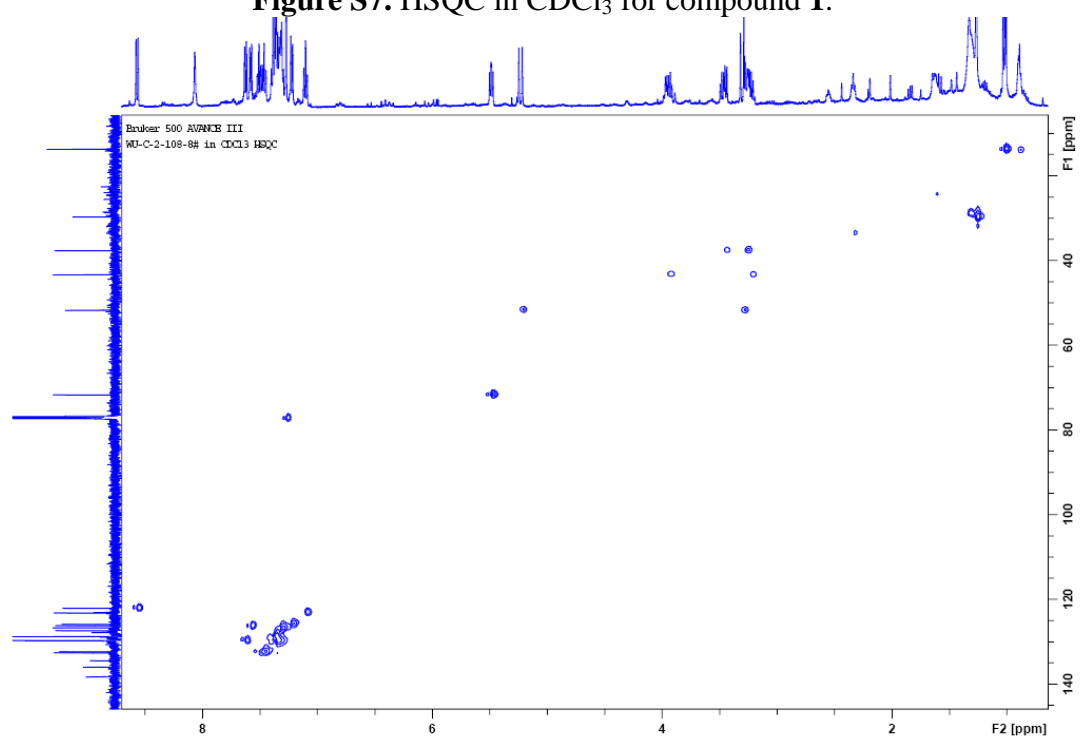

Figure S8. HMBC in CDCl<sub>3</sub> for compound 1.

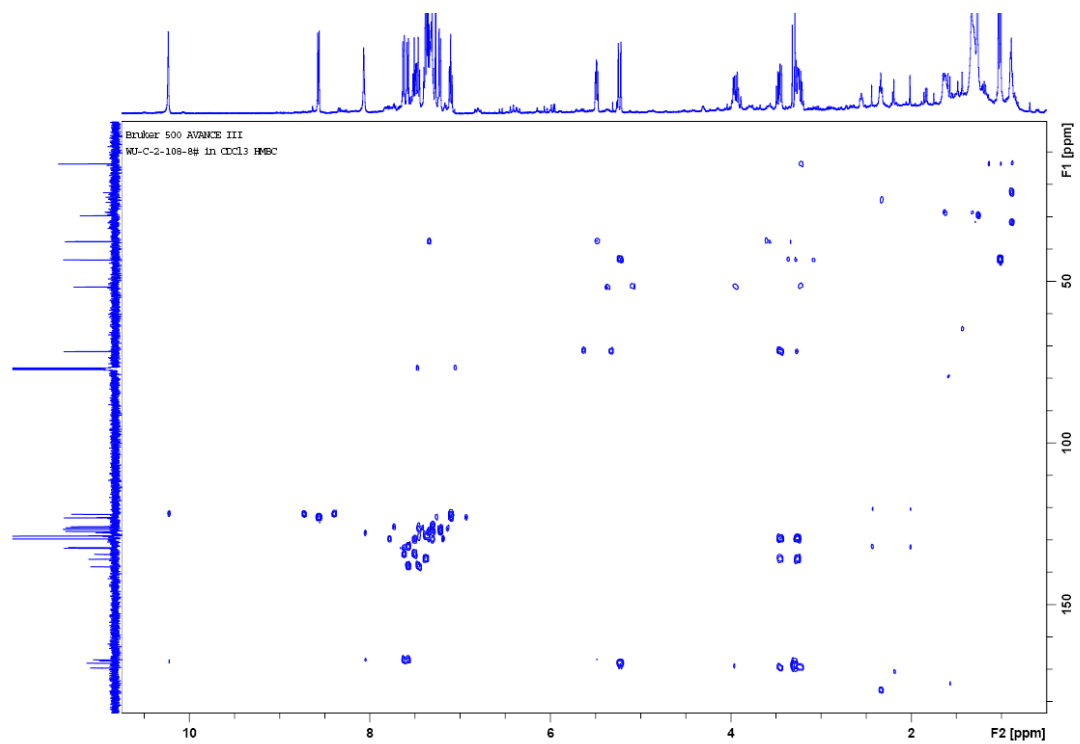

Figure S9. HMBC-2 in CDCl<sub>3</sub> for compound 1.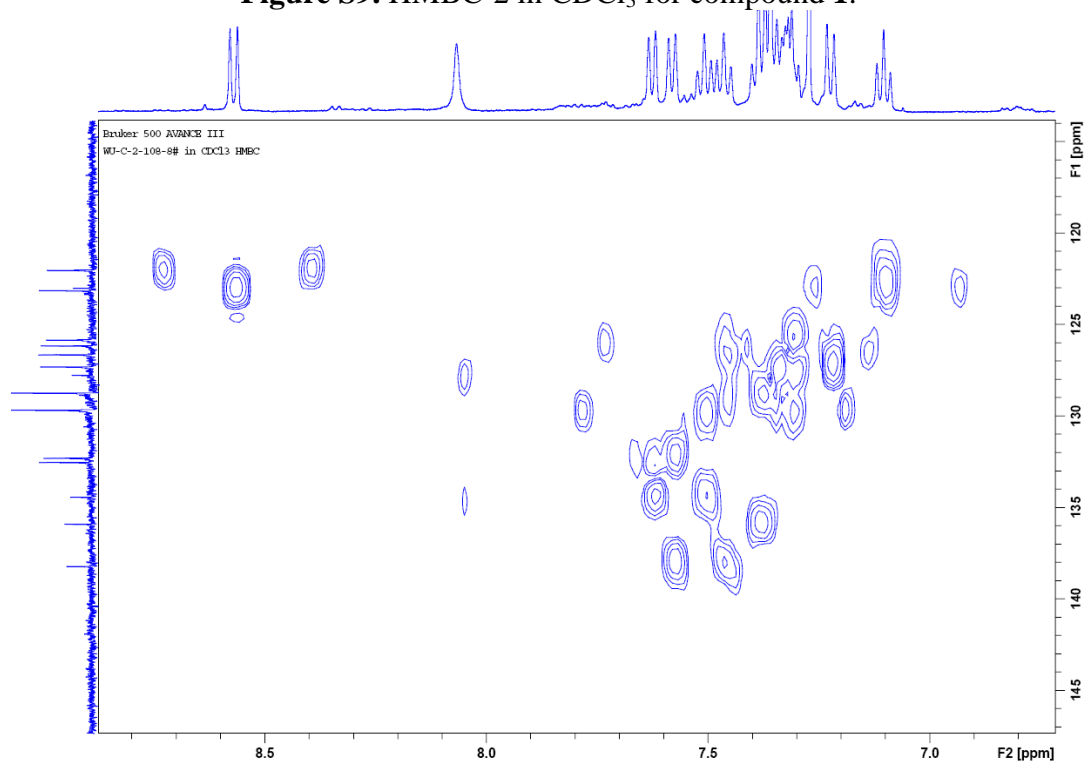Figure S10. <sup>1</sup>H NMR in CDCl<sub>3</sub> for compound 2.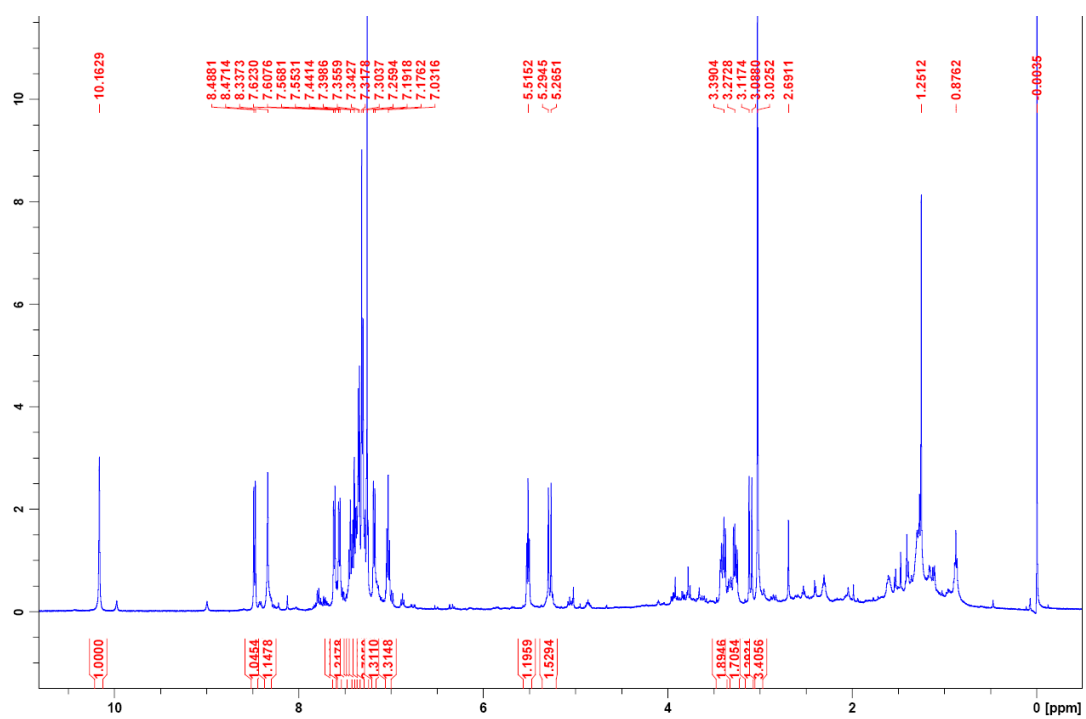

Figure S11.  $^1\text{H}$  NMR-2 in  $\text{CDCl}_3$  for compound 2.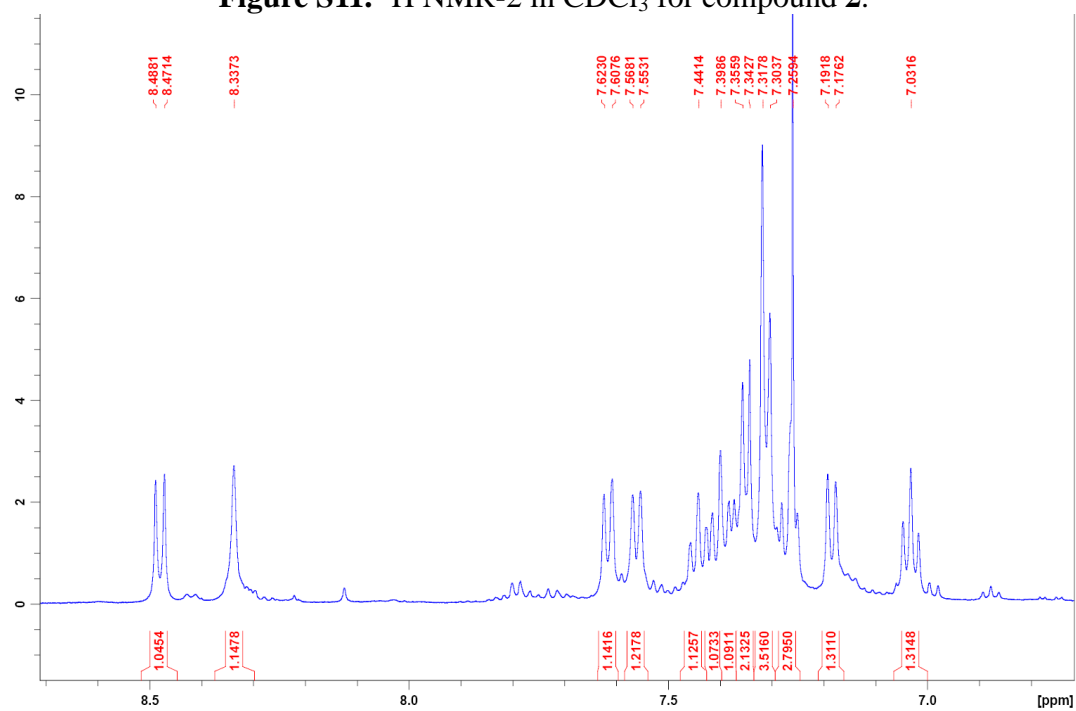Figure S12.  $^{13}\text{C}$  NMR in  $\text{CDCl}_3$  for compound 2.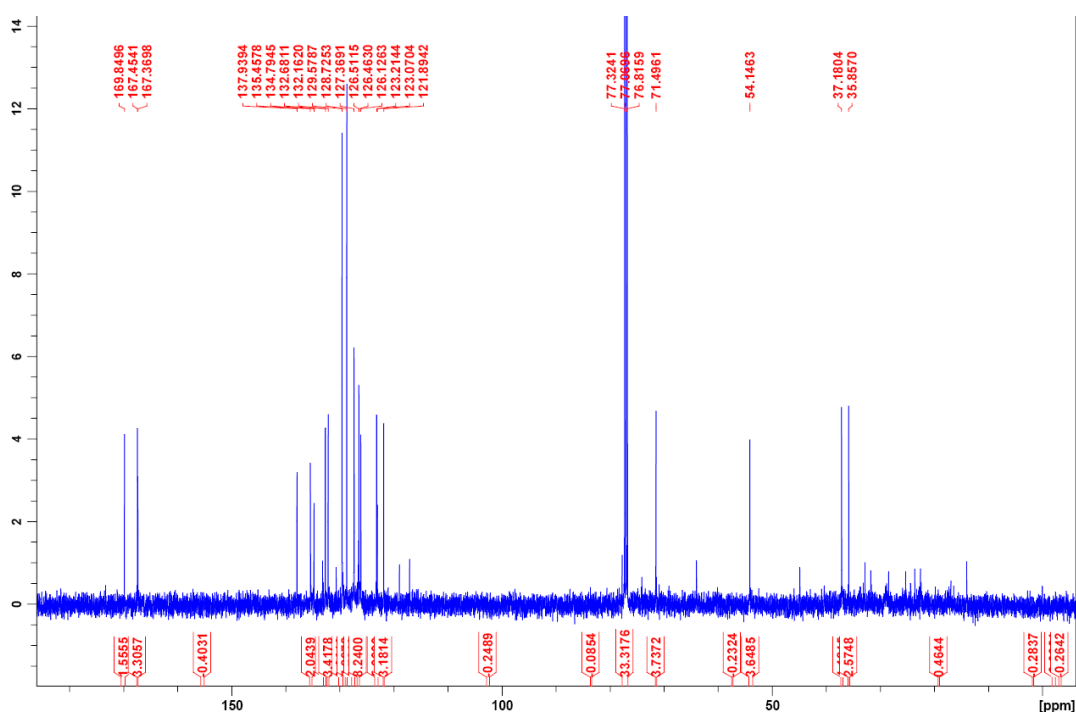

Figure S13. COSY in CDCl<sub>3</sub> for compound 2.

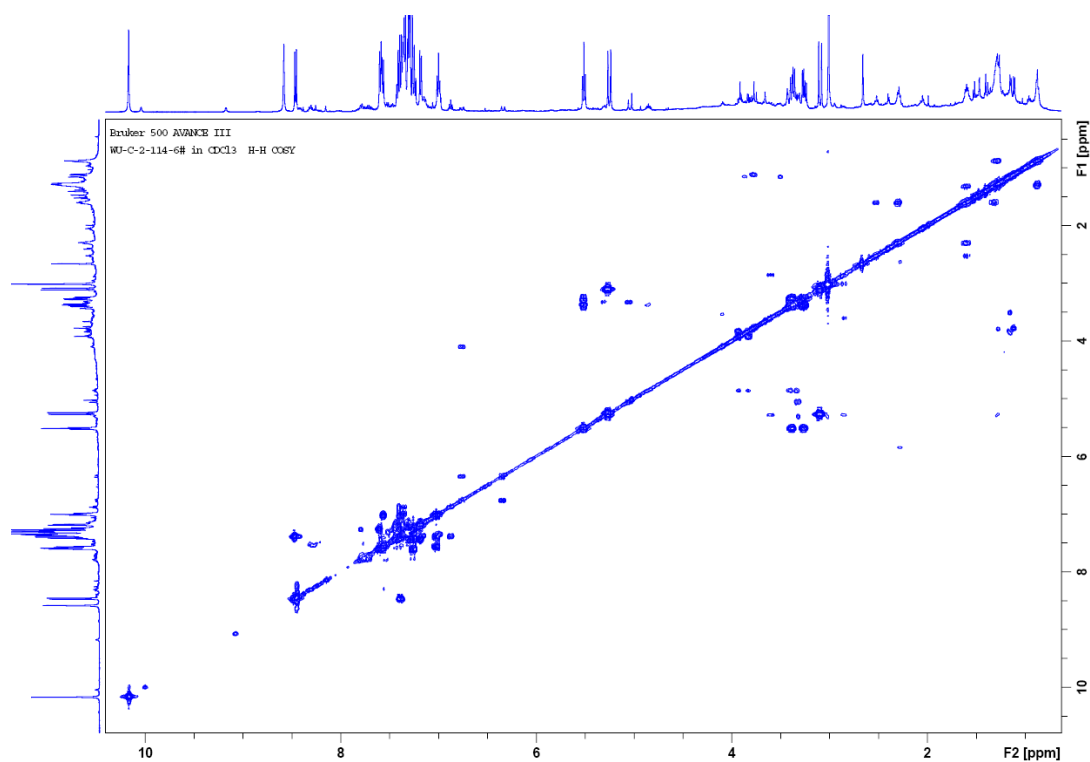

Figure S14. COSY-2 in CDCl<sub>3</sub> for compound 2.

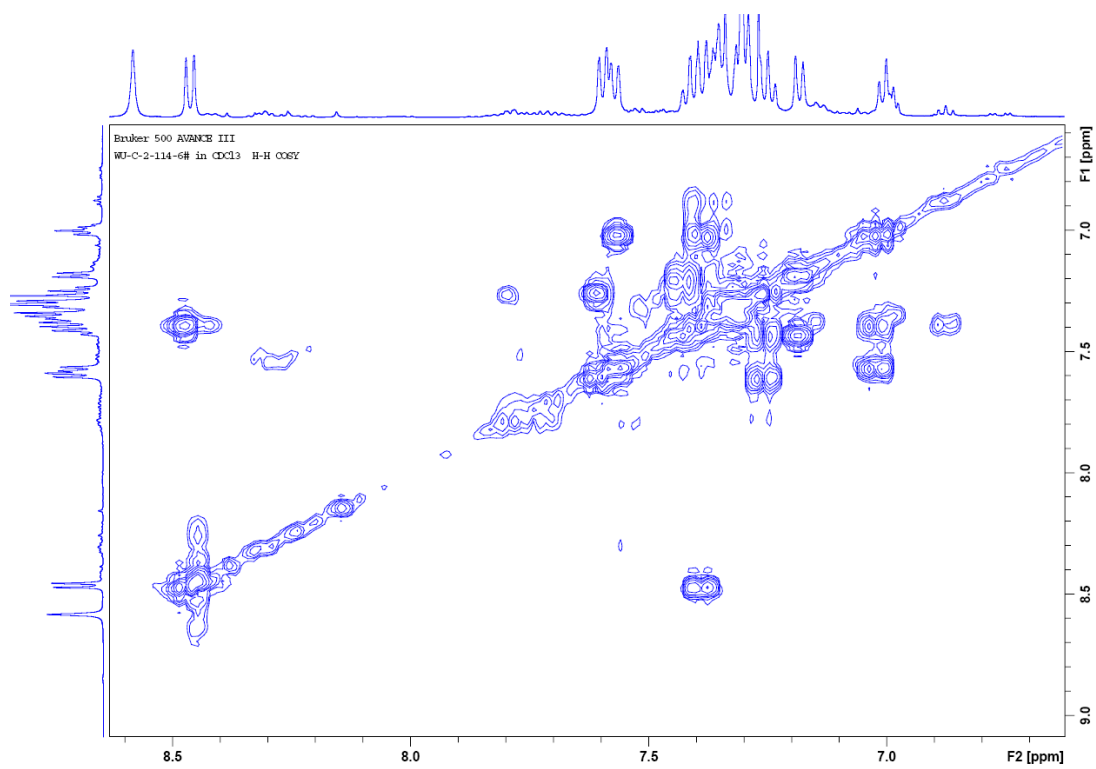





**Figure S17.** HMBC in CDCl<sub>3</sub> for compound 2.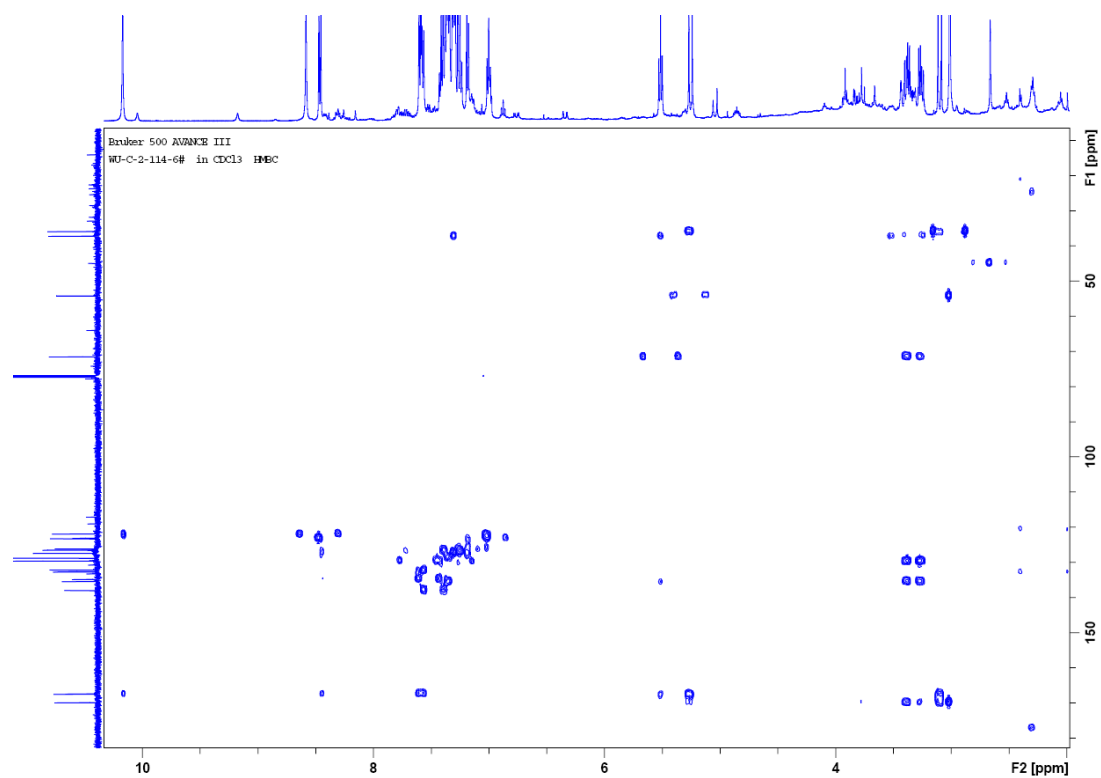**Figure S18.** HMBC-2 in CDCl<sub>3</sub> for compound 2.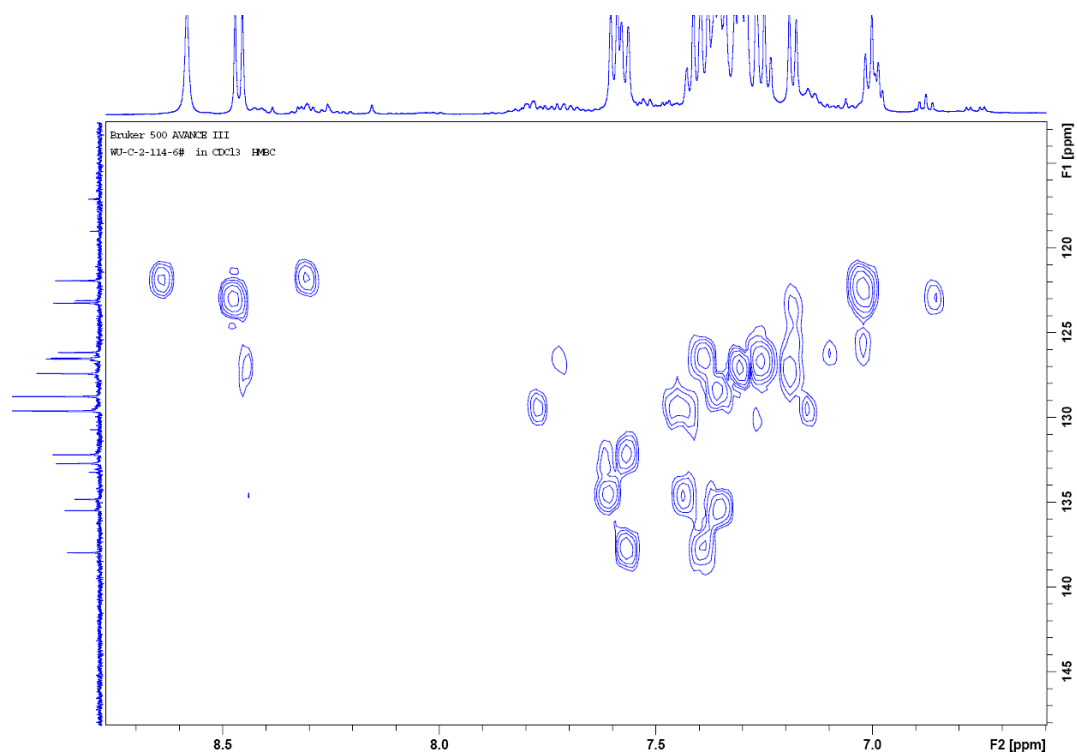

Figure S19. IR for compound 1.

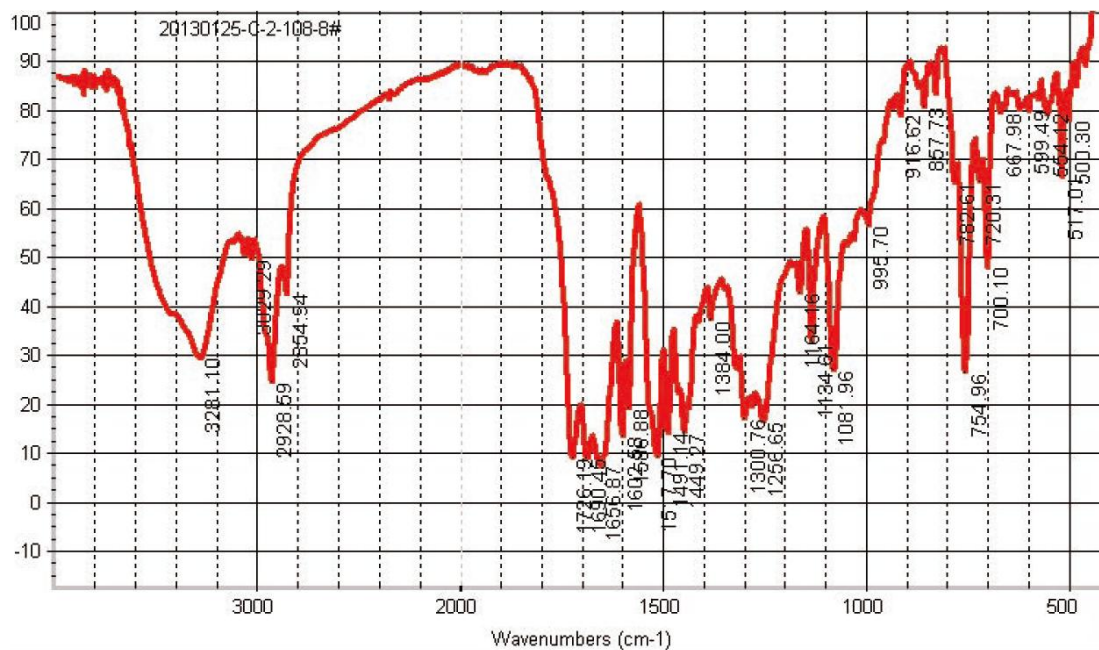

Figure S20. IR for compound 2.

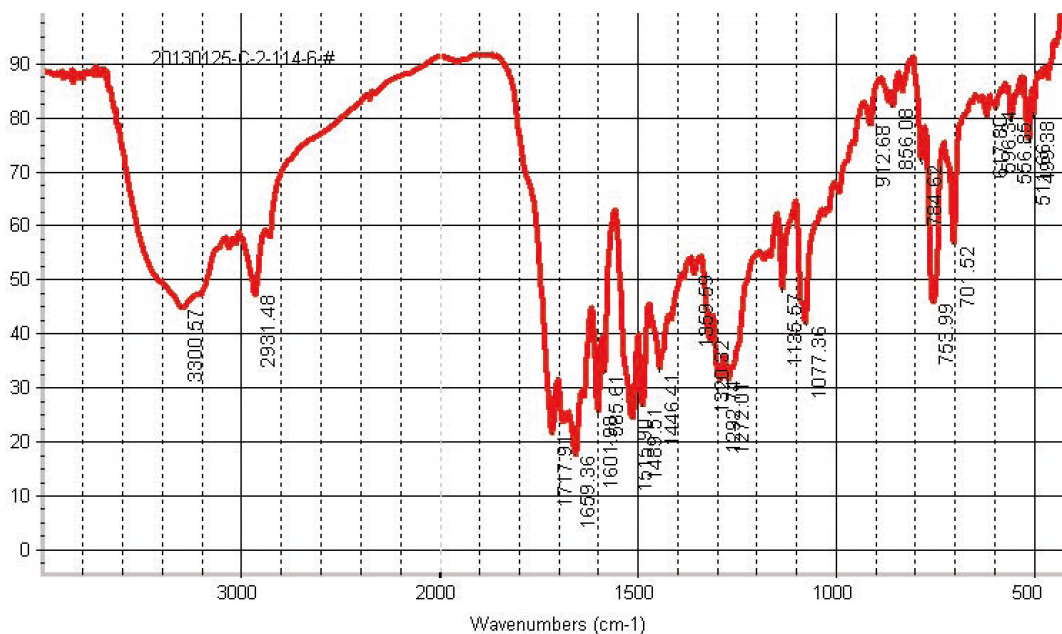

**Figure S21. HR-TOF-MS for compound 1.**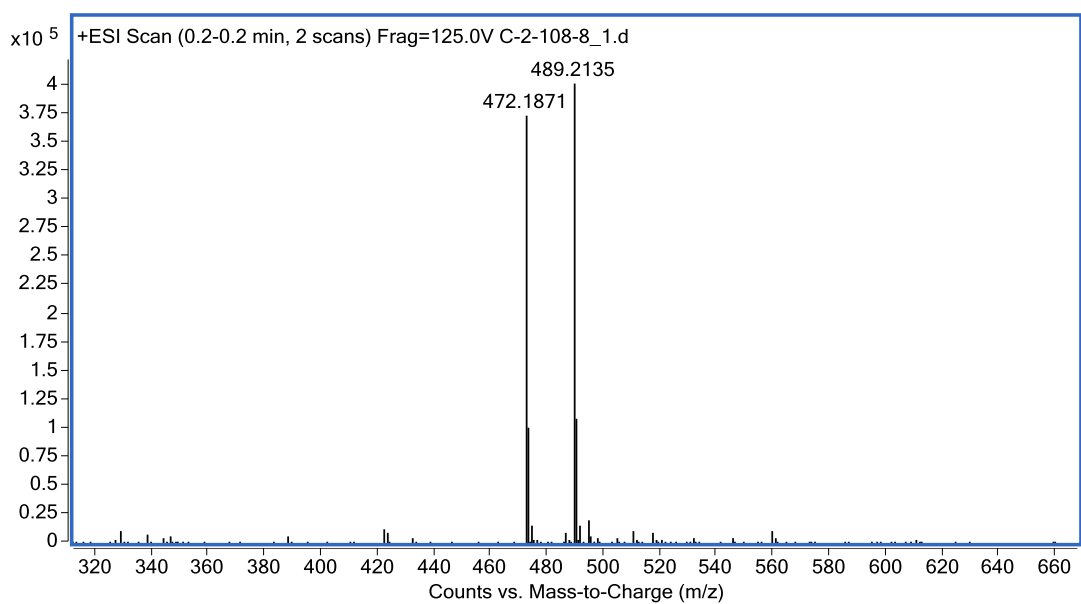**Figure S22. HR-TOF-MS for compound 2.**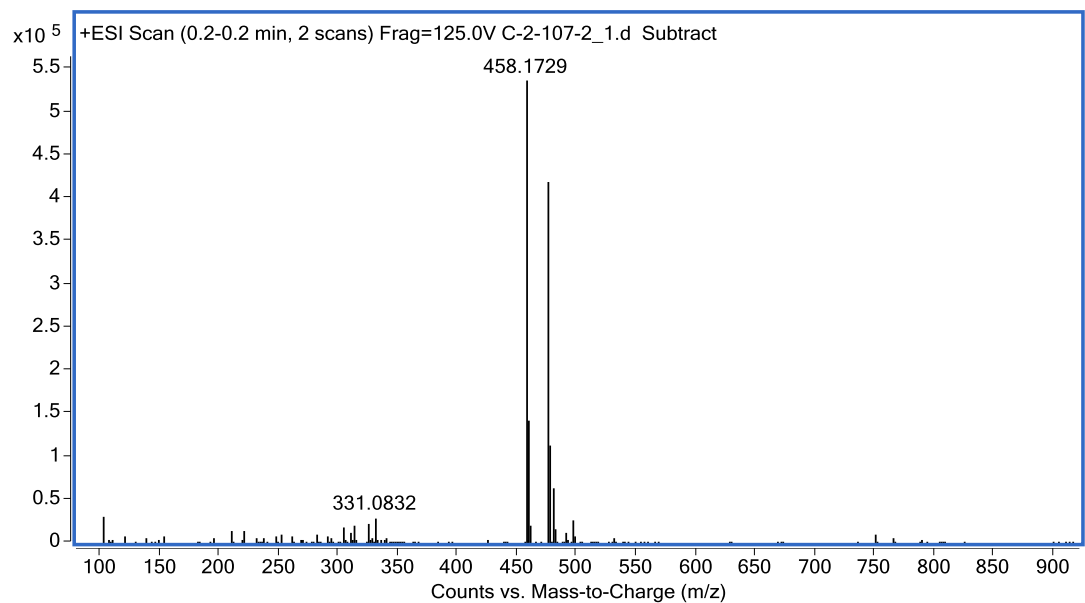

Figure S23. CD for compound 1.

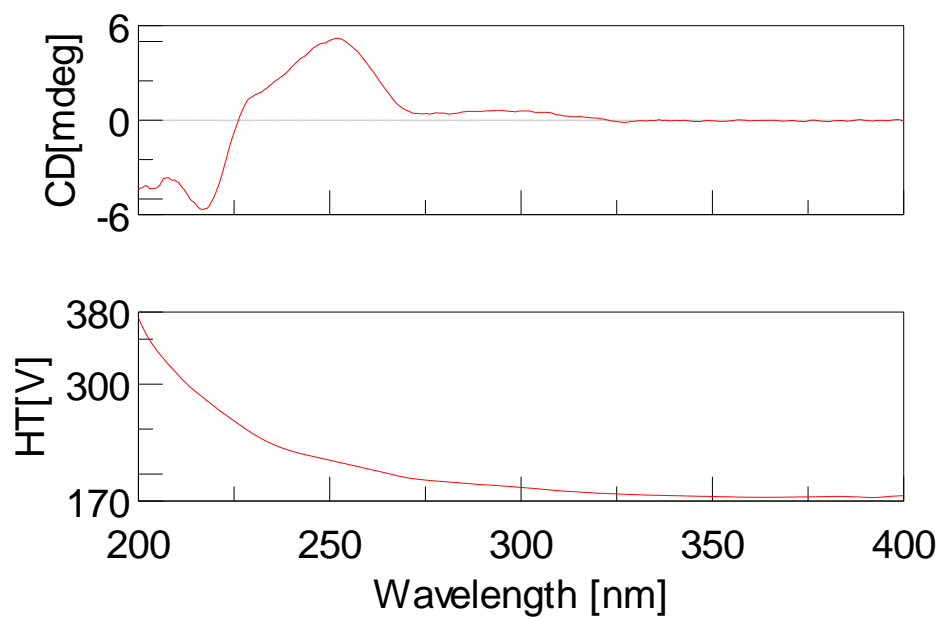

Figure S24. CD for compound 2.

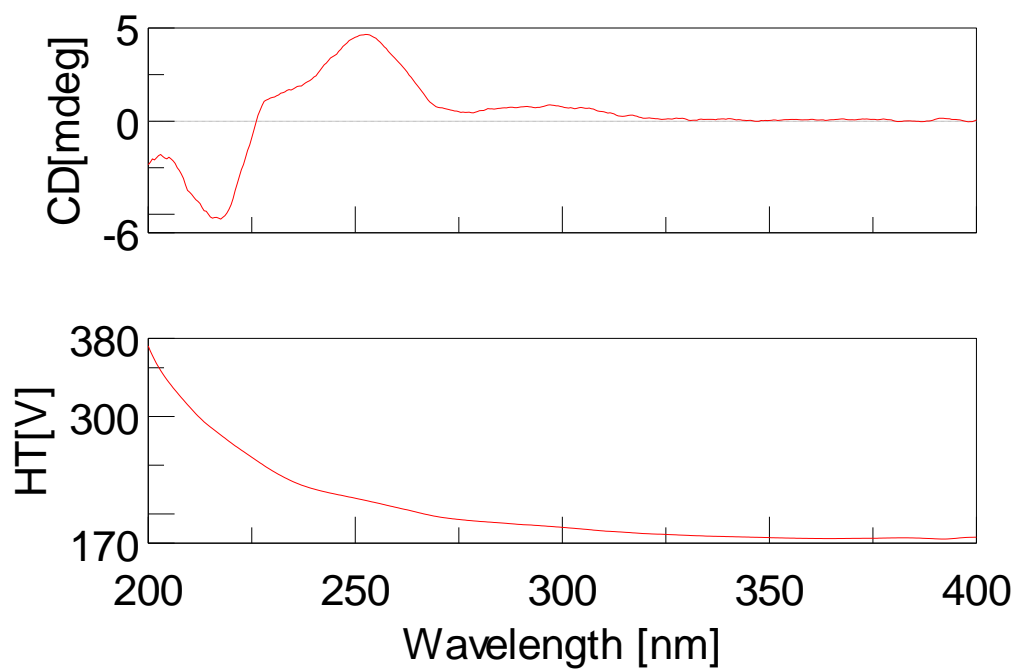

Figure S25. CID for compound 1.

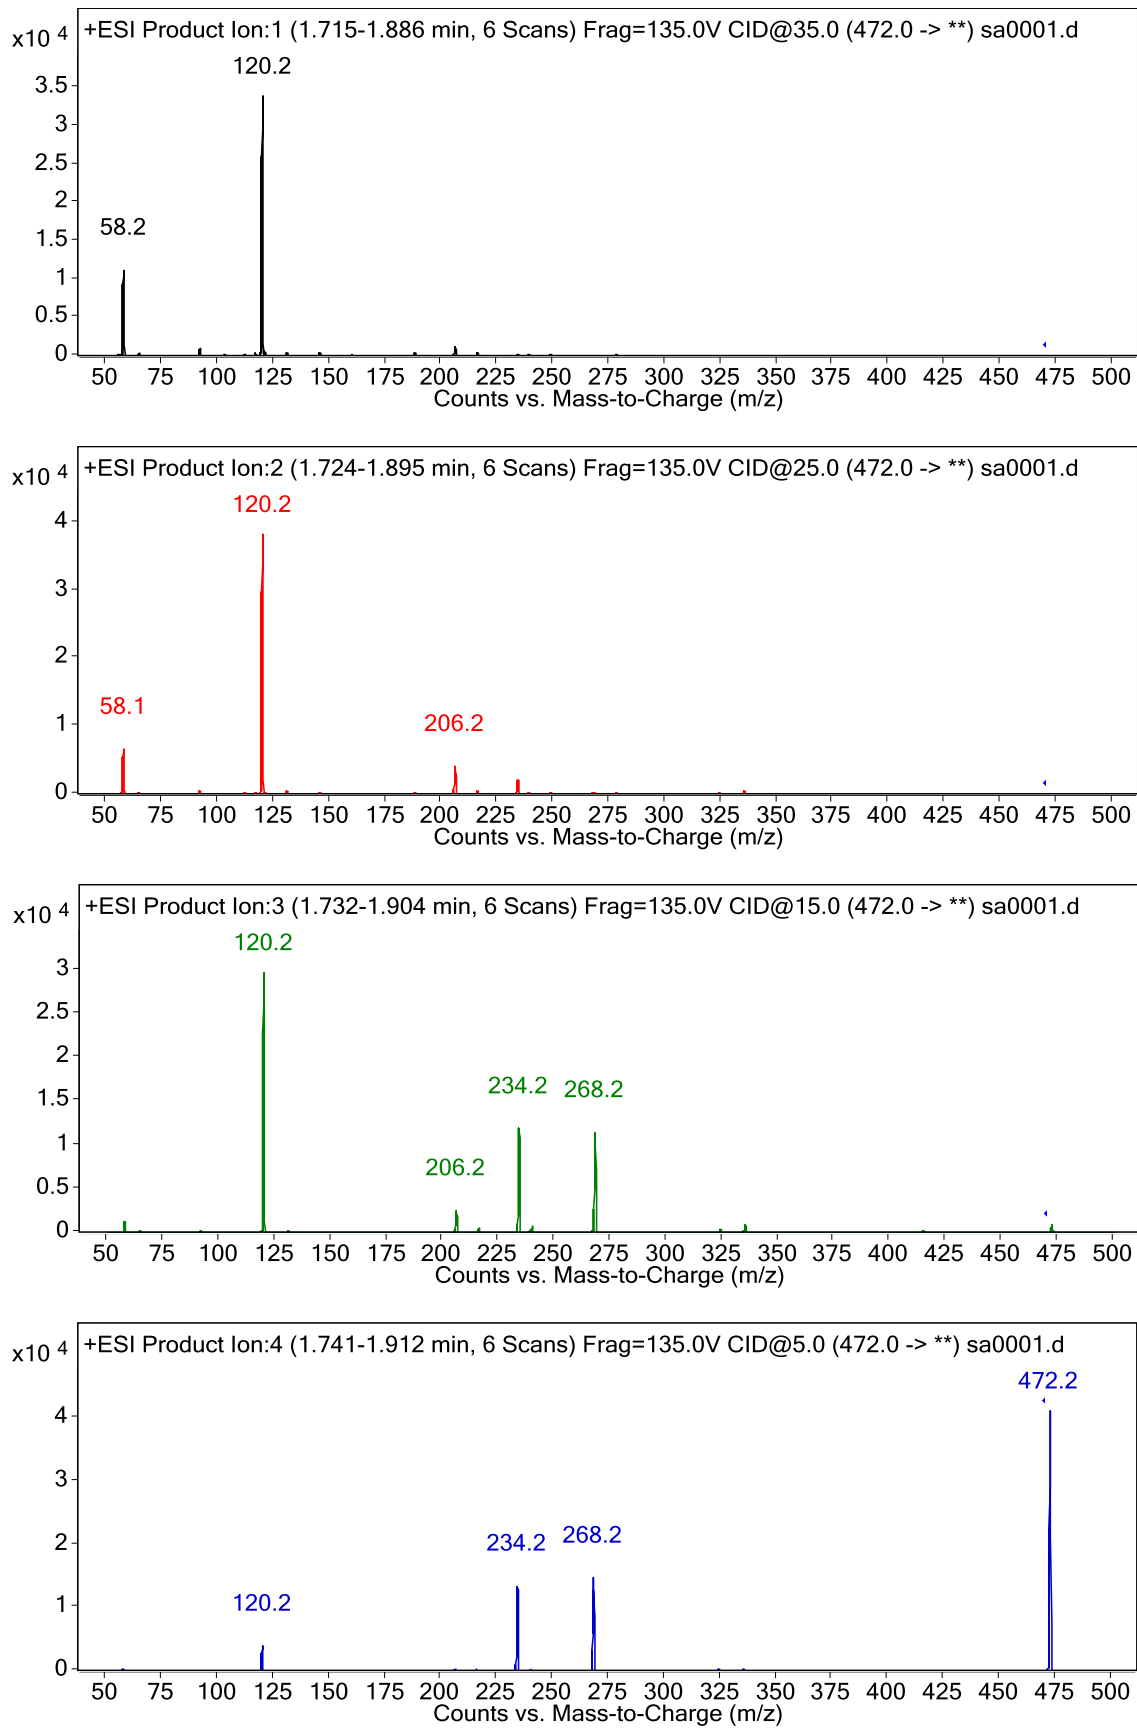

Supplement: s1 [file s1]
